# Supplementary material
Source: PubMed Central journal article supplement (PMC6496064)
Supplement: AAC.02658-18-s0001.pdf [file AAC.02658-18-s0001.pdf]

## Supplemental Appendix Figure 1. Study Cohort

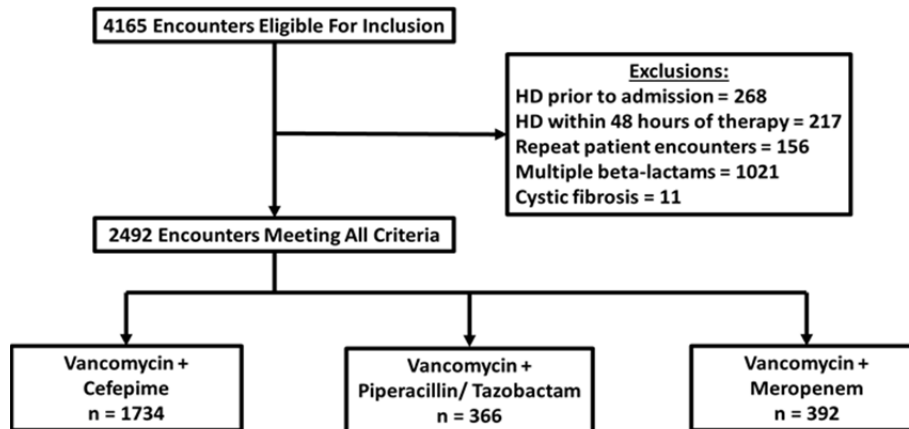

## Supplemental Appendix Figure 2. Acute Kidney Injury Rates as a Function of Initial Vancomycin Troughs

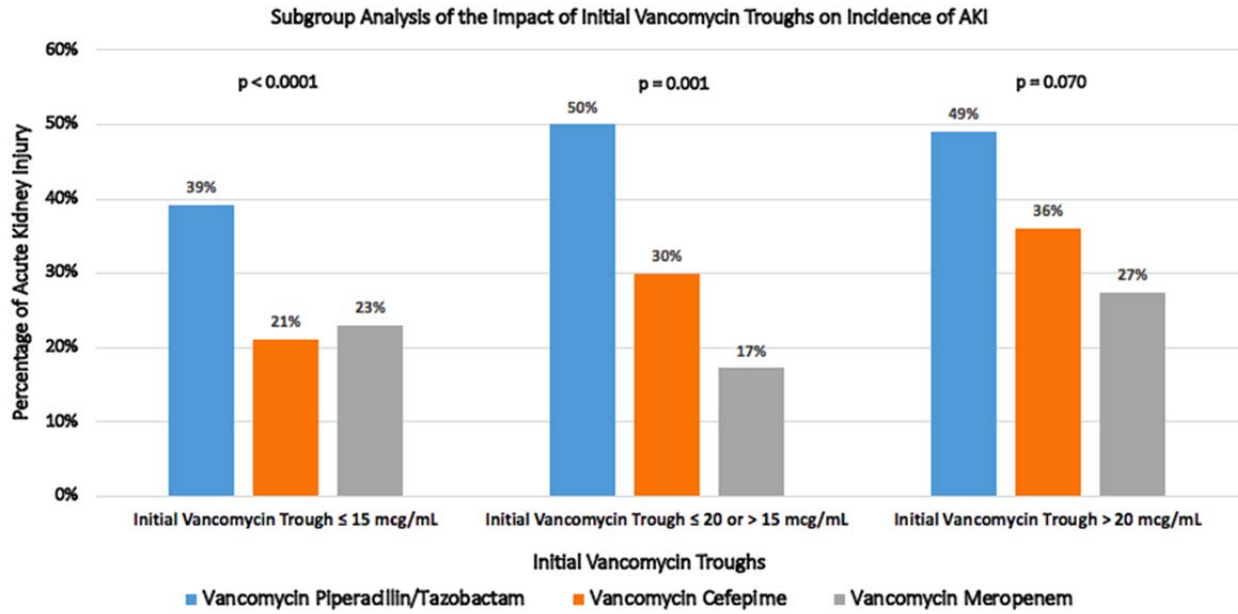

| Patients with AKI / Total Patients in Group | Initial Vancomycin Trough ≤ 15 mcg/mL | Initial Vancomycin Trough ≤ 20 or > 15 mcg/mL | Initial Vancomycin Trough > 20 mcg/mL |
|---------------------------------------------|---------------------------------------|-----------------------------------------------|---------------------------------------|
| Vancomycin Piperacillin/Tazobactam          | 74 / 189                              | 25 / 50                                       | 24 / 49                               |
| Vancomycin Cefepime                         | 197 / 935                             | 62 / 207                                      | 71 / 197                              |
| Vancomycin Meropenem                        | 46 / 201                              | 10 / 58                                       | 15 / 55                               |

**Supplemental Appendix Table 1. Bivariate Analysis of Predictors of Acute Kidney Injury in the Combined Population**

| Baseline Characteristics                         | No AKI<br>n=1837   | AKI<br>n= 655      | p value    |
|--------------------------------------------------|--------------------|--------------------|------------|
| Age, [IQR]                                       | 59 [47 - 69]       | 61 [50 - 71]       | p < 0.0001 |
| Gender, no. (%)                                  | 986 (53.7)         | 362 (55.3)         | p = 0.482  |
| Weight, [IQR]                                    | 48 [64 - 94]       | 81 [67 -100]       | p < 0.0001 |
| MICU                                             | 860 (46.8%)        | 323 (49.3%)        | p = 0.272  |
| SICU                                             | 602 (32.8%)        | 273 (41.7%)        | p < 0.0001 |
| NeuroICU                                         | 375 (20.4%)        | 59 (9.0%)          | p < 0.0001 |
| APACHE II, [IQR]                                 | 15 [12 - 19]       | 18 [14 - 22]       | p < 0.0001 |
| Charlson Score, [IQR]                            | 4 [2 - 7]          | 5 [3 - 8]          | p < 0.0001 |
| Sepsis, no. (%)                                  | 739 (40.2)         | 367 (56.0)         | p < 0.0001 |
| Mechanical Ventilation, no. (%)                  | 923 (50.2)         | 382 (58.3)         | p < 0.0001 |
| SBP < 90, no. (%)                                | 1146 (62.4)        | 507 (77.4)         | p < 0.0001 |
| Vasopressor Use, no. (%)                         | 257 (19.7)         | 398 (33.5)         | p < 0.0001 |
| One or More Concomitant Nephrotoxins, no. (%)    | 1391 (75.7)        | 564 (86.1)         | p < 0.0001 |
| Baseline WBC, [IQR]                              | 13 [9 -19]         | 15 [10 - 21]       | p = 0.003  |
| Baseline CrCl, [IQR]                             | 72 [51 - 94]       | 56 [36 - 78]       | p < 0.0001 |
| CrCl < 60                                        | 645 (35.1%)        | 365 (55.7%)        | p < 0.0001 |
| CHF, no. (%)                                     | 424 (23.1)         | 201 (30.7)         | p < 0.0001 |
| COPD, no. (%)                                    | 626 (34.1)         | 248 (37.9)         | p = 0.081  |
| Diabetes, no. (%)                                | 366 (19.9)         | 141 (21.5)         | p = 0.382  |
| Severe Hepatitis, no. (%)                        | 81 (4.4)           | 54 (8.2)           | p < 0.0001 |
| Initial Vancomycin Dose (mg) Per 24 Hours, [IQR] | 2000 [2000 - 3000] | 2000 [1500 - 2500] | p = 0.034  |
| Initial Vancomycin Trough, [IQR]                 | 11 [8 - 16]        | 13 [9 - 19]        | p < 0.0001 |
| Days of Antibiotic Therapy, [IQR]                | 3 [2 -5]           | 4 [3 - 6]          | p < 0.0001 |
| Piperacillin/Tazobactam, no. (%)                 | 222 (12.1)         | 144 (22.0)         | p < 0.0001 |
| Cefepime, no. (%)                                | 1315 (71.6)        | 419 (64.0)         | p < 0.0001 |
| Meropenem, no. (%)                               | 300 (16.3)         | 92 (14.0)          | p = 0.168  |

Abbreviations: AKI - acute kidney injury, CHF = congestive heart failure, COPD = chronic obstructive pulmonary disease, CrCl = creatinine clearance, IQR = interquartile range, no. = number, WBC = white blood cell count
